# Supplementary material
Source: publisher figshare collection journal article supplement (https://karger.figshare.com/ndownloader/files/36003749)
Supplement: Supplementary file 1 [file 36003749]

Supplement 1

Item-response probabilities within each of the four classes (n = 1,015)

| Class 1  *No Support/Only social*  (n=548) | | Class 2  *Online help*  (n=170) | Class 3  *GP/Outpatient*  (n=208) | Class 4  *All sources*  (n=89) |
| --- | --- | --- | --- | --- |
| Type of support or treatment / Proportion appealing | | | | |
| Info internet | 0.06 | 0.49 | 0.20 | 0.61 |
| Forum | 0.04 | 0.43 | 0.14 | 0.53 |
| Book | 0.03 | 0.22 | 0.12 | 0.62 |
| Social support | 0.32 | 0.68 | 0.66 | 0.71 |
| Online unguided self-help | 0.01 | 0.46 | 0.00 | 0.74 |
| Online guided self-help | 0.00 | 0.41 | 0.16 | 0.80 |
| General practitioner | 0.03 | 0.19 | 0.60 | 0.67 |
| Outpatient SUD treatment | 0.06 | 0.28 | 0.66 | 0.78 |
| Inpatient SUD treatment | 0.02 | 0.05 | 0.27 | 0.37 |
| Self-help group | 0.02 | 0.07 | 0.22 | 0.54 |
